# Supplementary material
Source: PubMed Central journal article supplement (PMC7641148)
Supplement: 41396_2020_692_MOESM3_ESM.pdf [file 41396_2020_692_MOESM3_ESM.pdf]

|    | SH192265.07FU | SH184510.07FU | SH218845.07FU | SH176742.07FU | SH184509.07FU |
|----|---------------|---------------|---------------|---------------|---------------|
| 1  | 0             | 0             | 0             | 0             | 0             |
| 2  | 1             | 0             | 1             | 0             | 0             |
| 3  | 0             | 0             | 0             | 0             | 0             |
| 4  | 0             | 0             | 0             | 0             | 0             |
| 5  | 0             | 0             | 0             | 0             | 0             |
| 6  | 0             | 0             | 0             | 0             | 0             |
| 7  | 1             | 0             | 0             | 1             | 0             |
| 8  | 0             | 1             | 0             | 0             | 0             |
| 9  | 1             | 1             | 0             | 1             | 0             |
| 10 | 0             | 0             | 1             | 0             | 0             |
| 11 | 0             | 0             | 1             | 0             | 0             |
| 12 | 0             | 0             | 1             | 1             | 0             |
| 13 | 0             | 0             | 0             | 1             | 0             |
| 14 | 1             | 1             | 0             | 0             | 0             |
| 15 | 0             | 0             | 0             | 0             | 0             |
| 16 | 0             | 1             | 0             | 0             | 0             |
| 17 | 1             | 0             | 0             | 0             | 0             |
| 18 | 1             | 1             | 1             | 1             | 0             |
| 19 | 1             | 0             | 1             | 1             | 0             |
| 20 | 0             | 0             | 0             | 0             | 0             |
| 21 | 0             | 0             | 0             | 0             | 1             |
| 22 | 0             | 0             | 0             | 0             | 0             |
| 23 | 0             | 0             | 0             | 0             | 0             |
| 24 | 0             | 1             | 0             | 0             | 1             |
| 25 | 0             | 0             | 0             | 0             | 1             |
| 26 | 0             | 0             | 0             | 0             | 0             |
| 27 | 0             | 0             | 0             | 0             | 0             |
| 28 | 0             | 0             | 0             | 0             | 0             |
| 29 | 0             | 0             | 0             | 0             | 0             |
| 30 | 0             | 0             | 0             | 0             | 0             |
| 31 | 0             | 0             | 0             | 0             | 0             |
| 32 | 0             | 0             | 0             | 0             | 0             |
| 33 | 0             | 0             | 0             | 0             | 0             |
| 34 | 0             | 0             | 0             | 0             | 0             |
| 35 | 0             | 0             | 0             | 0             | 0             |
| 36 | 0             | 0             | 0             | 0             | 0             |
| 37 | 1             | 1             | 0             | 0             | 0             |
| 38 | 1             | 1             | 0             | 0             | 0             |
| 39 | 0             | 0             | 0             | 0             | 0             |
| 40 | 0             | 0             | 0             | 0             | 0             |
| 41 | 1             | 0             | 0             | 0             | 0             |
| 42 | 0             | 0             | 0             | 0             | 0             |













SH211892.07FU SH179996.07FU SH194158.07FU SH214587.07FU SH221086.07FU SH176746.07FU

[illegible]









SH221018.07FU SH221087.07FU SH221476.07FU SH176685.07FU SH002708.07FU SH176745.07FU

[illegible]





SH030463.07FU SH032168.07FU SH032475.07FU SH171032.07FU SH174195.07FU SH176517.07FU

[illegible]

SH176548.07FU SH176598.07FU SH176741.07FU SH176743.07FU SH176744.07FU SH176747.07FU

[illegible]

1





SH177631.07FU SH177783.07FU SH177787.07FU SH177814.07FU SH177822.07FU SH177825.07FU

[illegible]

SH177832.07FU SH177840.07FU SH177859.07FU SH177871.07FU SH177872.07FU SH177965.07FU

[illegible]

SH178450.07FU SH178628.07FU SH178630.07FU SH178662.07FU SH179272.07FU SH179273.07FU

[illegible]

SH179316.07FU SH179624.07FU SH179809.07FU SH179824.07FU SH181080.07FU SH182376.07FU

[illegible]

SH182378.07FU SH182379.07FU SH182662.07FU SH182846.07FU SH183757.07FU SH183761.07FU

[illegible]

SH184514.07FU SH184519.07FU SH184522.07FU SH184562.07FU SH184571.07FU SH184573.07FU

[illegible]



SH186850.07FU SH187352.07FU SH188472.07FU SH188510.07FU SH188580.07FU SH189353.07FU

[illegible]

SH189379.07FU SH189403.07FU SH189435.07FU SH189474.07FU SH189513.07FU SH189610.07FU

[illegible]







SH197709.07FU SH197819.07FU SH197927.07FU SH199433.07FU SH199699.07FU SH201230.07FU

[illegible]

SH201990.07FU SH202491.07FU SH203892.07FU SH204902.07FU SH205568.07FU SH205569.07FU

[illegible]

SH206583.07FU SH207283.07FU SH207800.07FU SH209828.07FU SH210482.07FU SH210710.07FU

[illegible]

SH210711.07FU SH212102.07FU SH212565.07FU SH213065.07FU SH213172.07FU SH213649.07FU

[illegible]

SH213658.07FU SH213920.07FU SH213927.07FU SH214009.07FU SH214073.07FU SH214492.07FU

[illegible]

SH214500.07FU SH214599.07FU SH214615.07FU SH214626.07FU SH214628.07FU SH214642.07FU

[illegible]





SH217380.07FU SH217480.07FU SH217891.07FU SH217904.07FU SH218098.07FU SH218195.07FU

[illegible]



SH219984.07FU SH220034.07FU SH220213.07FU SH220214.07FU SH220816.07FU SH220850.07FU

[illegible]

SH220963.07FU SH221024.07FU SH221083.07FU SH222335.07FU SH222454.07FU SH222621.07FU

[illegible]

SH223410.07FU SH460224.07FU SH461851.07FU SH472222.07FU SH478588.07FU SH487020.07FU

[illegible]



| SH529395.07FU | SH531620.07FU | SH533223.07FU | SH641593.07FU |    |
|---------------|---------------|---------------|---------------|----|
| 0             | 0             | 0             | 0             | 77 |
| 0             | 0             | 0             | 0             | 10 |
| 0             | 0             | 0             | 0             | 4  |
| 0             | 0             | 0             | 0             | 2  |
| 0             | 0             | 0             | 0             | 2  |
| 0             | 0             | 0             | 1             | 3  |
| 0             | 0             | 0             | 0             | 6  |
| 0             | 0             | 0             | 0             | 9  |
| 0             | 0             | 0             | 0             | 10 |
| 0             | 0             | 0             | 0             | 8  |
| 0             | 0             | 0             | 0             | 6  |
| 0             | 0             | 0             | 0             | 4  |
| 0             | 0             | 0             | 0             | 16 |
| 0             | 0             | 0             | 0             | 20 |
| 0             | 0             | 0             | 0             | 7  |
| 0             | 0             | 0             | 0             | 9  |
| 0             | 0             | 0             | 0             | 7  |
| 0             | 0             | 0             | 0             | 19 |
| 0             | 0             | 0             | 0             | 5  |
| 0             | 0             | 0             | 0             | 1  |
| 0             | 0             | 0             | 0             | 4  |
| 0             | 0             | 0             | 0             | 3  |
| 0             | 0             | 0             | 0             | 3  |
| 0             | 0             | 0             | 0             | 6  |
| 1             | 1             | 1             | 0             | 32 |
| 0             | 0             | 0             | 0             | 3  |
| 0             | 0             | 0             | 0             | 2  |
| 0             | 0             | 0             | 0             | 10 |
| 0             | 0             | 0             | 0             | 3  |
| 0             | 0             | 0             | 0             | 4  |
| 0             | 0             | 0             | 0             | 15 |
| 0             | 0             | 0             | 0             | 6  |
| 0             | 0             | 0             | 0             | 15 |
| 0             | 0             | 0             | 0             | 3  |
| 0             | 0             | 0             | 0             | 3  |
| 0             | 0             | 0             | 0             | 2  |
| 0             | 0             | 0             | 0             | 23 |
| 0             | 0             | 0             | 0             | 20 |
| 0             | 0             | 0             | 0             | 1  |
| 0             | 0             | 0             | 0             | 5  |
| 0             | 0             | 0             | 0             | 3  |
| 0             | 0             | 0             | 0             | 9  |
